# Supplementary material
Source: PubMed Central journal article supplement (PMC8229876)
Supplement: NIHMS1710932-supplement-1.pdf [file NIHMS1710932-supplement-1.pdf]

31. K. M. Kwan et al., The Tol2kit: a multisite gateway-based construction kit for Tol2 transposon transgenesis constructs. *Dev Dyn* 236, 3088-3099 (2007).
32. J. Livet et al., Transgenic strategies for combinatorial expression of fluorescent proteins in the nervous system. *Nature* 450, 56-62 (2007).
33. T. A. Zelenchuk, J. L. Bruses, In vivo labeling of zebrafish motor neurons using an mnx1 enhancer and Gal4/UAS. *Genesis* 49, 546-554 (2011). PMC3642388.
34. A. B. Arrenberg, F. Del Bene, H. Baier, Optical control of zebrafish behavior with halorhodopsin. *Proc Natl Acad Sci U S A* 106, 17968-17973 (2009). PMC2764931.
35. K. Kawakami, K. Asakawa, A. Muto, H. Wada, Tol2-mediated transgenesis, gene trapping, enhancer trapping, and Gal4-UAS system. *Methods Cell Biol* 135, 19-37 (2016).
36. S. Higashijima, H. Okamoto, N. Ueno, Y. Hotta, G. Eguchi, High-frequency generation of transgenic zebrafish which reliably express GFP in whole muscles or the whole body by using promoters of zebrafish origin. *Dev Biol* 192, 289-299 (1997).
37. C. Satou et al., Transgenic tools to characterize neuronal properties of discrete populations of zebrafish neurons. *Development* 140, 3927-3931 (2013).
38. S. Bello-Rojas, A. E. Istrate, S. Kishore, D. L. McLean, Central and peripheral innervation patterns of defined axial motor units in larval zebrafish. *J Comp Neurol* 527, 2557-2572 (2019). PMC6688944.
39. R. W. Koster, S. E. Fraser, Tracing transgene expression in living zebrafish embryos. *Dev Biol* 233, 329-346 (2001).
40. S. D. Seredick, L. Van Ryswyk, S. A. Hutchinson, J. S. Eisen, Zebrafish Mnx proteins specify one motoneuron subtype and suppress acquisition of interneuron characteristics. *Neural Dev* 7, 35 (2012). PMC3570319.
41. E. Menelaou, C. VanDunk, D. L. McLean, Differences in the morphology of spinal V2a neurons reflect their recruitment order during swimming in larval zebrafish. *J Comp Neurol* 522, 1232-1248 (2014). PMC4692166.
42. M. P. Meyer, S. J. Smith, Evidence from in vivo imaging that synaptogenesis guides the growth and branching of axonal arbors by two distinct mechanisms. *J Neurosci* 26, 3604-3614 (2006). PMC6673851.
43. M. A. Masino, J. R. Fetcho, Fictive swimming motor patterns in wild type and mutant larval zebrafish. *J Neurophysiol* 93, 3177-3188 (2005).
44. Z. I. Botev, J. F. Grotowski, D. P. Kroese, Kernel density estimation via diffusion. *Annals of Statistics* 38, 2916-2957 (2010).
45. J. B. Bikoff et al., Spinal inhibitory interneuron diversity delineates variant motor microcircuits. *Cell* 165, 207-219 (2016). PMC4808435.
46. W. J. Heitler, Practical tools for analysing rhythmic neural activity. *J Neurosci Methods* 185, 151-164 (2009).
